# Supplementary material for: Synthesis and characterisation of heteroatom-doped reduced graphene oxide/bismuth oxide nanocomposites and their application as photoanodes in DSSCs
Source: Royal Society of Chemistry journal article supplement (doi:10.1039/d1ra08888b), 2022-01-01
Supplement: d1ra08888b1.pdf [file d1ra08888b1.pdf]

## Synthesis and characterisation of heteroatom-doped reduced graphene oxide/bismuth oxide nanocomposites and their application as photoanodes in DSSCs

Nonjabulo P. D. Ngidi, Edigar Muchuweni<sup>†</sup> and Vincent O. Nyamori\*

School of Chemistry and Physics, University of KwaZulu-Natal, Westville Campus, Private Bag X54001, Durban 4000, South Africa

\*Corresponding author: Tel. +27-31-2608256, Fax: +27-31-2603091, Email: nyamori@ukzn.ac.za

<sup>†</sup>On leave from Bindura University of Science Education, Department of Engineering and Physics, Private Bag 1020, Bindura, Zimbabwe

Email addresses of co-authors: nonjabulongidi@gmail.com, muchuwenie@ukzn.ac.za

### Supplementary Data

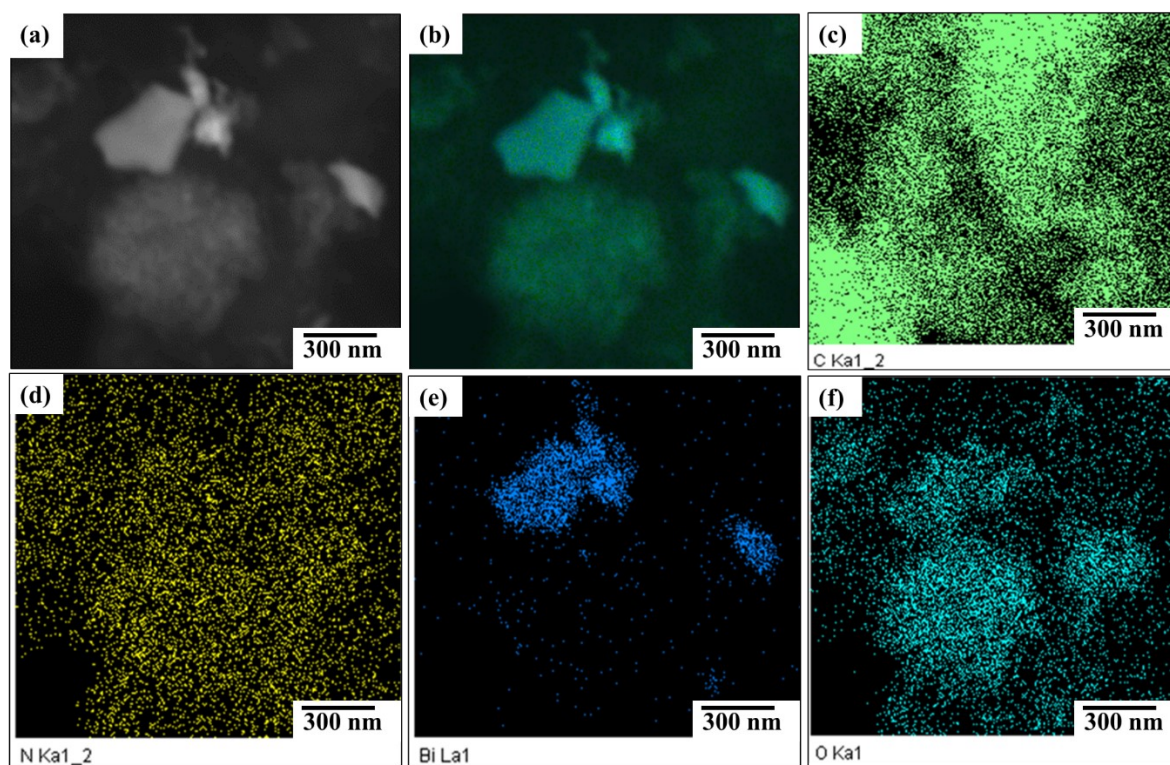

**Figure S1:** (a) TEM image of N-rGO/Bi<sub>2</sub>O<sub>3</sub>, and (b) elemental mapping of the elements in N-rGO/Bi<sub>2</sub>O<sub>3</sub>. Corresponding individual mapping of (c) carbon, (d) nitrogen, (e) bismuth and (f) oxygen for N-rGO/Bi<sub>2</sub>O<sub>3</sub> nanocomposite.

**Table S1:** Elemental composition of the nanocomposites.

| Sample                               | Elemental analysis |            |          |            | ICP-OES     |                                   |
|--------------------------------------|--------------------|------------|----------|------------|-------------|-----------------------------------|
|                                      | Carbon/%           | Hydrogen/% | Oxygen/% | Nitrogen/% | Boron/%     | Bi <sub>2</sub> O <sub>3</sub> /% |
| rGO/Bi <sub>2</sub> O <sub>3</sub>   | 67.61 ± 1          | 3.82 ± 1   | 3.57 ± 1 | -          | -           | 20.8 ± 0.01                       |
| N-rGO/Bi <sub>2</sub> O <sub>3</sub> | 59.28 ± 1          | 5.43 ± 1   | 3.01 ± 1 | 3.76 ± 1   | -           | 28.5 ± 0.02                       |
| B-rGO/Bi <sub>2</sub> O <sub>3</sub> | 66.39 ± 1          | 3.69 ± 1   | 2.36 ± 1 | -          | 2.56 ± 0.02 | 25.0 ± 0.01                       |

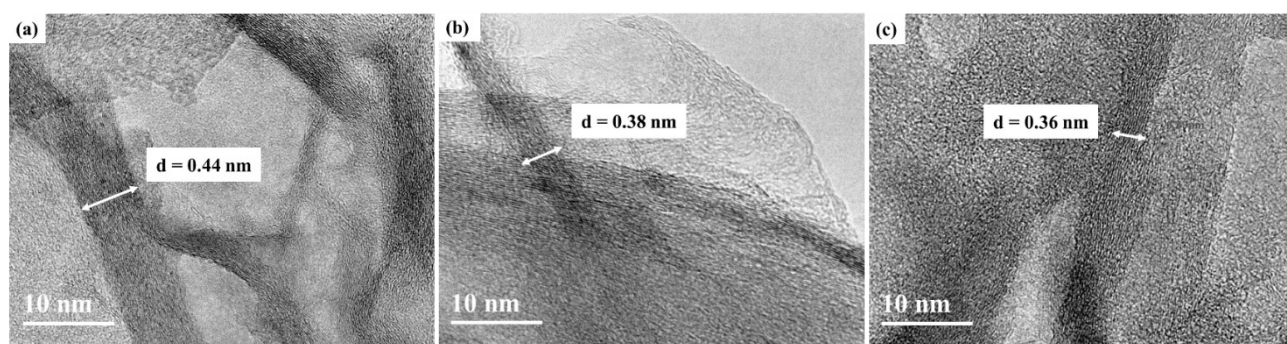

**Figure S2:** HRTEM image of (a) rGO, (b) N-rGO, and (c) B-rGO.

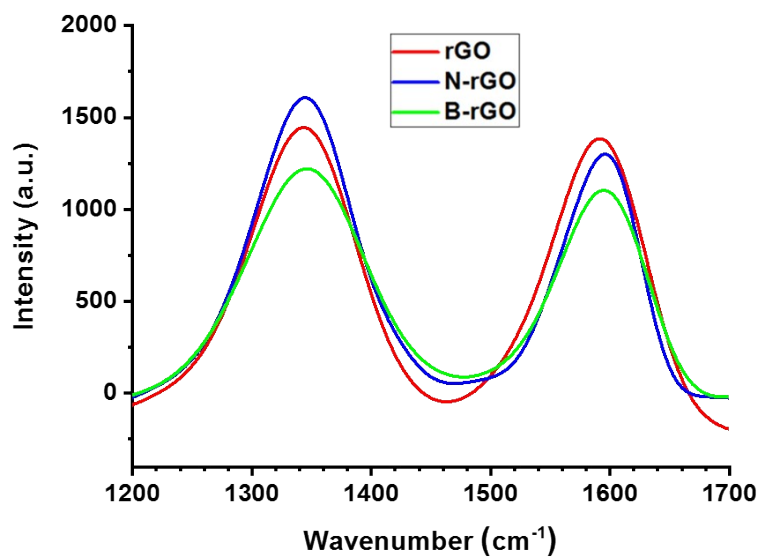

**Figure S3:** Raman spectra of rGO, N-rGO, and B-rGO.

**Table S2:** Raman spectral properties of rGO and heteroatom-doped rGO.

| Sample | D-band/cm <sup>-1</sup> | G-band/cm <sup>-1</sup> | $I_D/I_G$ |
|--------|-------------------------|-------------------------|-----------|
| rGO    | 1350                    | 1594                    | 0.71      |
| N-rGO  | 1350                    | 1598                    | 1.09      |
| B-rGO  | 1350                    | 1599                    | 1.18      |

**Table S3:** Decomposition temperatures and residual content of the nanocomposites.

| Sample                               | Decomposition temperature/°C | Residual content/% |
|--------------------------------------|------------------------------|--------------------|
| rGO/Bi <sub>2</sub> O <sub>3</sub>   | 518                          | 42                 |
| N-rGO/Bi <sub>2</sub> O <sub>3</sub> | 490                          | 57                 |
| B-rGO/Bi <sub>2</sub> O <sub>3</sub> | 437                          | 38                 |

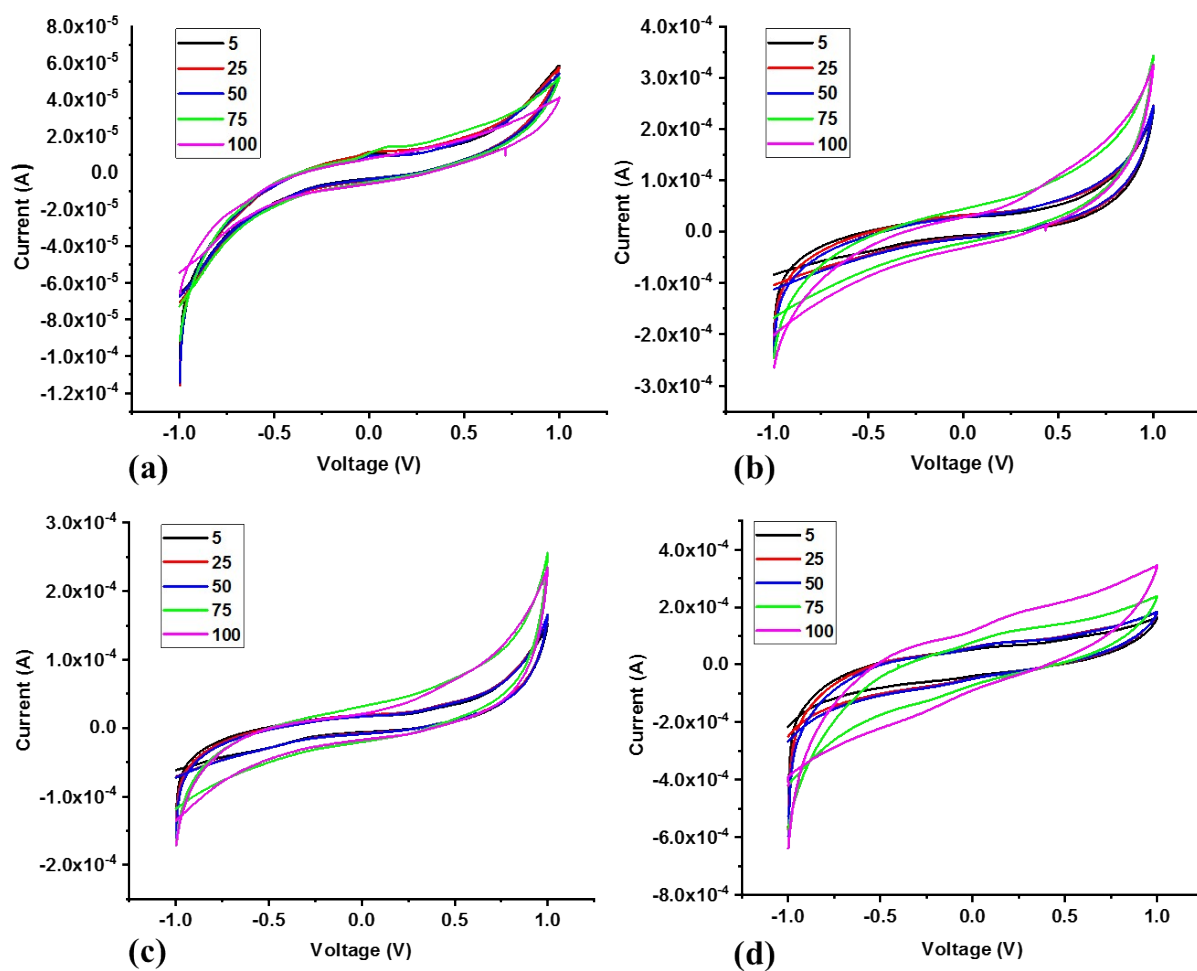

**Figure S4:** (a) Cyclic voltammograms of (a)  $\text{Bi}_2\text{O}_3$ , (b)  $\text{rGO}/\text{Bi}_2\text{O}_3$ , (c)  $\text{N-rGO}/\text{Bi}_2\text{O}_3$  and (d)  $\text{B-rGO}/\text{Bi}_2\text{O}_3$  at scan rates of 5, 25, 50, 75, and 100  $\text{mV s}^{-1}$ , in the potential range from -1.0 to 1.0 V.
